## 18.2 - Epidemiology, Prognosis, Outcome

**Acute coronary syndrome in COVID-19 patients. Clinical features, severity and outcomes. Results from Spanish multicenter registry Car-COVID19**

Abellas Sequeiros M.<sup>1</sup>; Sanmartin Fernandez M.<sup>1</sup>; Cosin Sales J.<sup>2</sup>; Corbi Pascual M.<sup>3</sup>; Escudier Villa JM.<sup>4</sup>; Garcia Del Egado A.<sup>5</sup>; Becerra Munoz VM.<sup>6</sup>; Martinez Dolz L.<sup>7</sup>; Gonzalez Juanatey C.<sup>8</sup>; Raposeiras Roubin S.<sup>9</sup>; Barge Caballero E.<sup>10</sup>; Jorge Perez P.<sup>11</sup>; Baron Esquivas G.<sup>12</sup>; Anguita Sanchez M.<sup>13</sup>; Zamorano JL.<sup>1</sup>

<sup>1</sup>University Hospital Ramon y Cajal de Madrid, Madrid, Spain

<sup>2</sup>HOSPITAL ARNAU DE VILANOVA, Valencia, Spain

<sup>3</sup>Albacete University Hospital, Albacete, Spain

<sup>4</sup>University Hospital Puerta de Hierro Majadahonda, Madrid, Spain

<sup>5</sup>HOSPITAL OF LEON (COMPLEJO ASISTENCIAL UNIVERSITARIO DE LEON), Leon, Spain

<sup>6</sup>UNIVERSITY HOSPITAL VIRGEN DE LA VICTORIA, Malaga, Spain

<sup>7</sup>UNIVERSITY HOSPITAL Y POLITECNICO LA FE, Valencia, Spain

<sup>8</sup>University Hospital Lucus Augusti, Lugo, Spain

<sup>9</sup>University Hospital Alvaro Cunqueiro, Vigo, Spain

<sup>10</sup>CHUAC, A Coruna, Spain

<sup>11</sup>University Hospital of the Canaries, Santa Cruz de Tenerife, Spain

<sup>12</sup>Complex Public Hospital Virgen del Rocío Regional, Sevilla, Spain, Spain

<sup>13</sup>HOSPITAL QUIRONSAIUD CORDOBA, Cordoba, Spain

**Funding Acknowledgements:** Type of funding sources: Foundation. Main funding source(s): Fundación del Corazón

**Introduction:** COVID19 has spread uncontrollably all over the world through this 2020 year. As a new entity, we did not know the potential cardiovascular manifestations of this infectious disease. This national registry was created to describe the cardiac affection and its severity.

**Methods and results:** A multicenter registry was conducted, including 28 centers in Spain. Patients with COVID19 diagnosis presenting an acute cardiovascular event between March 1st and May 30th were included. Eighty-two patients were included. Of them, 49 (76,6%) presented with acute coronary syndrome; the rest were diagnosed of acute myocarditis or stress cardiomyopathy. The majority of cases were STEMI (n = 31), while the remaining 35,4% presented as NSTEMI. 29 patients (61,7%) underwent emergent percutaneous coronary intervention (PCI) (Figure 1). Anterior (n = 18) and inferior (n = 16) were the most frequent locations. Coronary angiogram showed total occlusion in 20 patients (55,6%); while 7 patients presented with non-obstructive coronary arteries. PCI was done in 31 patients.

Eight patients (17,8%) developed Killip III-IV myocardial infarction. A total of 10 patients required endotracheal intubation and vasoactive agent were needed in 11 patients; none required IABP or ECMO. In-hospital mortality rate was 26,2%.

**Conclusions:** Patients with COVID19 may present with acute coronary syndromes. This entity has a poor prognosis, with noteworthy mortality.

Table 1. Baseline characteristics.

|                          | n (%)           |
|--------------------------|-----------------|
| Age                      | 69,0[63,0-76,5] |
| Sex (female)             | 9 (19,1%)       |
| Hypertension             | 28 (57,1%)      |
| Dyslipidemia             | 25 (51,0%)      |
| Diabetes mellitus        | 11 (22,4%)      |
| Chronic coronary disease | 10 (20,4%)      |
| Previous PCI             | 10 (20,4%)      |
| Previous CABG            | 0               |
| Previous AAS             | 15 (30,6%)      |
| Smoking                  | 10 (20,4%)      |

**PCI:** percutaneous coronary intervention; **CABG:** coronary artery bypass graft; **AAS:** aspirin.  
Abstract Figure 1.

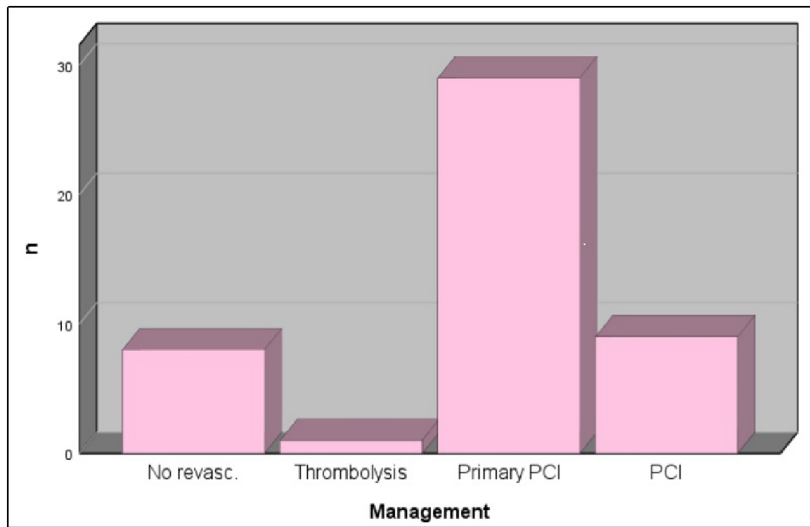

Source: http://academic.oup.com/ehjacc/article-pdf/10/Supplement_1/zuab020.067/37406866/zuab020.067.pdf
